# Supplementary material for: Ab Initio Prediction of Transcription Factor Targets Using Structural Knowledge
Source: PubMed Central journal article supplement (PMC1183507; doi:10.1371/journal.pcbi.0010001), 2005-06-24

## Figure S2 – Number of predicted direct targets

The number of predicted targets genes is shown for each transcription factor. A gene is considered to be a direct target of the factor if its 2Kb promoter region contain at least two significant putative binding sites (Bonferroni corrected  $p$ -value  $\leq 0.05$ )

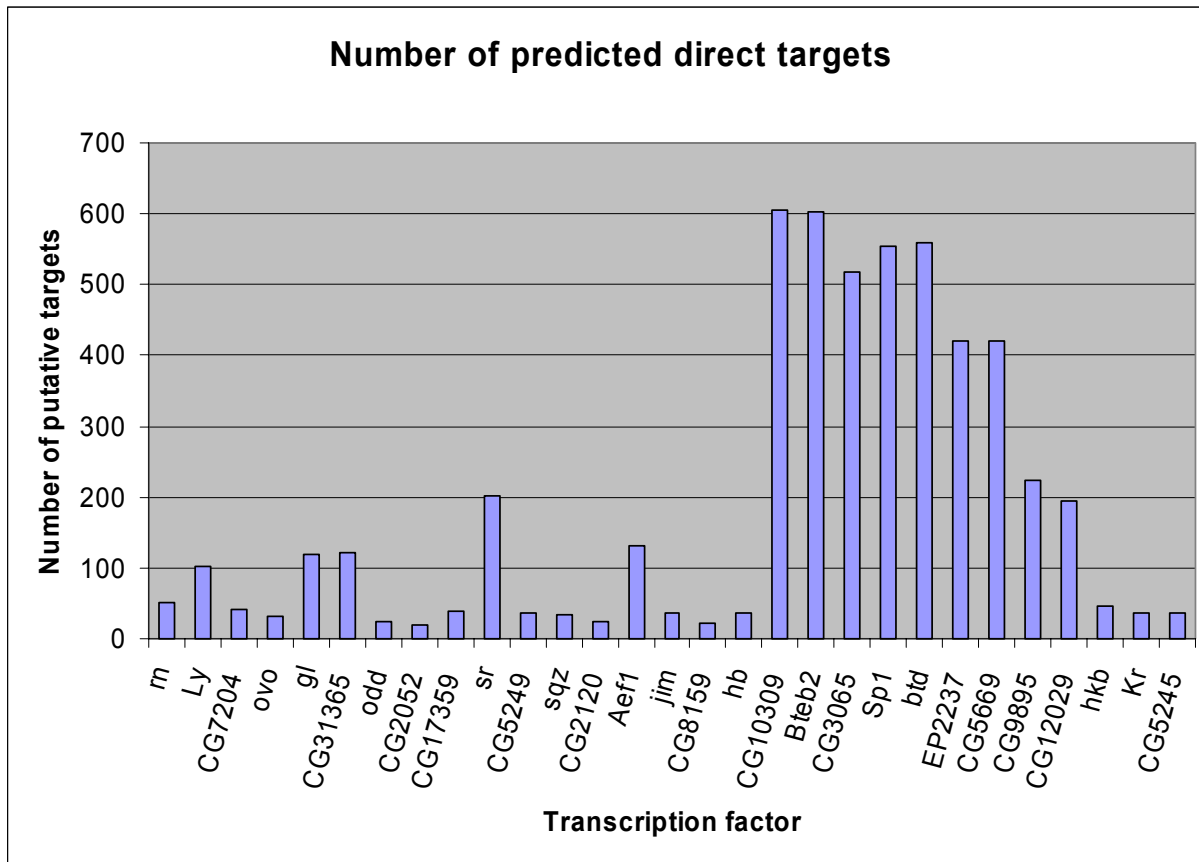

Supplement: pcbi.0010001.sg002.pdf [file pcbi.0010001.sg002.pdf]
