# Supplementary material for: Ab Initio Prediction of Transcription Factor Targets Using Structural Knowledge
Source: PubMed Central journal article supplement (PMC1183507; doi:10.1371/journal.pcbi.0010001), 2005-06-24
Supplement: pcbi.0010001.st001.pdf [file pcbi.0010001.st001.pdf]

**Table S1 - Four sets of DNA-recognition preferences: Probabilities**

Set of recognition preferences for amino acids at position 6 of the a-helix

|   | Gly   | Ala   | Val   | Ile   | Leu   | Phe   | Trp  | Tyr   | Met   | Cys   | Thr   | Ser   | Gln   | Asn   | Glu   | Asp   | His   | Arg   | Lys   | Pro   |
|---|-------|-------|-------|-------|-------|-------|------|-------|-------|-------|-------|-------|-------|-------|-------|-------|-------|-------|-------|-------|
| A | 0.297 | 0.01  | 0.232 | 0.124 | 0.192 | 0.121 | 0.25 | 0.039 | 0.145 | 0.293 | 0.224 | 0.074 | 0.32  | 0.524 | 0.146 | 0.103 | 0.23  | 0.011 | 0.111 | 0.146 |
| C | 0.125 | 0.003 | 0.053 | 0.056 | 0.102 | 0.466 | 0.25 | 0.136 | 0.104 | 0.431 | 0.097 | 0.116 | 0.112 | 0.169 | 0.566 | 0.674 | 0.108 | 0.012 | 0.035 | 0.146 |
| G | 0.125 | 0.884 | 0.364 | 0.227 | 0.41  | 0.121 | 0.25 | 0.632 | 0.337 | 0.155 | 0.53  | 0.661 | 0.316 | 0.139 | 0.23  | 0.108 | 0.427 | 0.948 | 0.664 | 0.146 |
| T | 0.453 | 0.104 | 0.352 | 0.593 | 0.296 | 0.293 | 0.25 | 0.193 | 0.413 | 0.121 | 0.149 | 0.149 | 0.252 | 0.169 | 0.057 | 0.115 | 0.235 | 0.029 | 0.19  | 0.563 |

Set of recognition preferences for amino acids at position 3 of the a-helix

|   | Gly   | Ala   | Val   | Ile   | Leu   | Phe   | Trp  | Tyr   | Met   | Cys   | Thr   | Ser   | Gln   | Asn   | Glu   | Asp   | His   | Arg   | Lys   | Pro   |
|---|-------|-------|-------|-------|-------|-------|------|-------|-------|-------|-------|-------|-------|-------|-------|-------|-------|-------|-------|-------|
| A | 0.189 | 0.048 | 0.074 | 0.073 | 0.059 | 0.121 | 0.25 | 0.124 | 0.204 | 0.354 | 0.35  | 0.242 | 0.317 | 0.705 | 0.173 | 0.046 | 0.142 | 0.15  | 0.062 | 0.146 |
| C | 0.432 | 0.085 | 0.103 | 0.072 | 0.049 | 0.466 | 0.25 | 0.345 | 0.285 | 0.354 | 0.16  | 0.201 | 0.379 | 0.085 | 0.66  | 0.858 | 0.027 | 0.01  | 0.016 | 0.146 |
| G | 0.195 | 0.083 | 0.44  | 0.073 | 0.386 | 0.121 | 0.25 | 0.174 | 0.084 | 0.146 | 0.064 | 0.328 | 0.083 | 0.139 | 0.025 | 0.047 | 0.804 | 0.704 | 0.816 | 0.146 |
| T | 0.185 | 0.784 | 0.384 | 0.783 | 0.506 | 0.293 | 0.25 | 0.357 | 0.426 | 0.146 | 0.426 | 0.228 | 0.221 | 0.071 | 0.142 | 0.049 | 0.027 | 0.136 | 0.106 | 0.563 |

Set of recognition preferences for amino acids at position 2 of the a-helix

|   | Gly   | Ala   | Val   | Ile   | Leu   | Phe   | Trp  | Tyr   | Met   | Cys   | Thr   | Ser   | Gln   | Asn   | Glu   | Asp   | His   | Arg   | Lys   | Pro   |
|---|-------|-------|-------|-------|-------|-------|------|-------|-------|-------|-------|-------|-------|-------|-------|-------|-------|-------|-------|-------|
| A | 0.158 | 0.028 | 0.079 | 0.08  | 0.146 | 0.015 | 0.25 | 0.111 | 0.25  | 0.354 | 0.367 | 0.132 | 0.477 | 0.495 | 0.129 | 0.049 | 0.185 | 0.076 | 0.095 | 0.092 |
| C | 0.417 | 0.608 | 0.112 | 0.08  | 0.146 | 0.933 | 0.25 | 0.63  | 0.25  | 0.354 | 0.158 | 0.326 | 0.155 | 0.187 | 0.543 | 0.928 | 0.122 | 0.012 | 0.02  | 0.155 |
| G | 0.068 | 0.018 | 0.144 | 0.08  | 0.146 | 0.015 | 0.25 | 0.026 | 0.103 | 0.146 | 0.065 | 0.422 | 0.155 | 0.159 | 0.088 | 0.011 | 0.489 | 0.735 | 0.762 | 0.367 |
| T | 0.357 | 0.346 | 0.665 | 0.761 | 0.563 | 0.037 | 0.25 | 0.233 | 0.397 | 0.146 | 0.41  | 0.12  | 0.213 | 0.16  | 0.24  | 0.012 | 0.204 | 0.177 | 0.123 | 0.385 |

Set of recognition preferences for amino acids at position -1 relatively to the a-helix

|   | Gly   | Ala   | Val   | Ile   | Leu   | Phe   | Trp   | Tyr   | Met   | Cys   | Thr   | Ser   | Gln   | Asn   | Glu   | Asp   | His   | Arg   | Lys   | Pro   |
|---|-------|-------|-------|-------|-------|-------|-------|-------|-------|-------|-------|-------|-------|-------|-------|-------|-------|-------|-------|-------|
| A | 0.247 | 0.055 | 0.121 | 0.08  | 0.072 | 0.121 | 0.428 | 0.202 | 0.25  | 0.354 | 0.38  | 0.233 | 0.402 | 0.529 | 0.218 | 0.129 | 0.165 | 0.044 | 0.095 | 0.146 |
| C | 0.248 | 0.127 | 0.121 | 0.08  | 0.019 | 0.466 | 0.185 | 0.399 | 0.25  | 0.354 | 0.15  | 0.14  | 0.015 | 0.165 | 0.685 | 0.726 | 0.223 | 0.023 | 0.101 | 0.146 |
| G | 0.258 | 0.056 | 0.121 | 0.08  | 0.017 | 0.121 | 0.198 | 0.071 | 0.103 | 0.146 | 0.213 | 0.48  | 0.338 | 0.138 | 0.031 | 0.068 | 0.408 | 0.878 | 0.71  | 0.146 |
| T | 0.247 | 0.762 | 0.638 | 0.761 | 0.892 | 0.293 | 0.188 | 0.327 | 0.397 | 0.146 | 0.257 | 0.147 | 0.246 | 0.168 | 0.066 | 0.077 | 0.204 | 0.055 | 0.093 | 0.563 |
