# Supplementary material for: Ab Initio Prediction of Transcription Factor Targets Using Structural Knowledge
Source: PLOS journal article supplement (doi:10.1371/journal.pcbi.0010001), 2005-06-24

### Figure S1 - Seq. logs of 29 Dros. Transcription factors

The predicted binding site models of 29 *Drosophila* Cys<sub>2</sub>His<sub>2</sub> ZF transcription factors are shown as sequences logos.

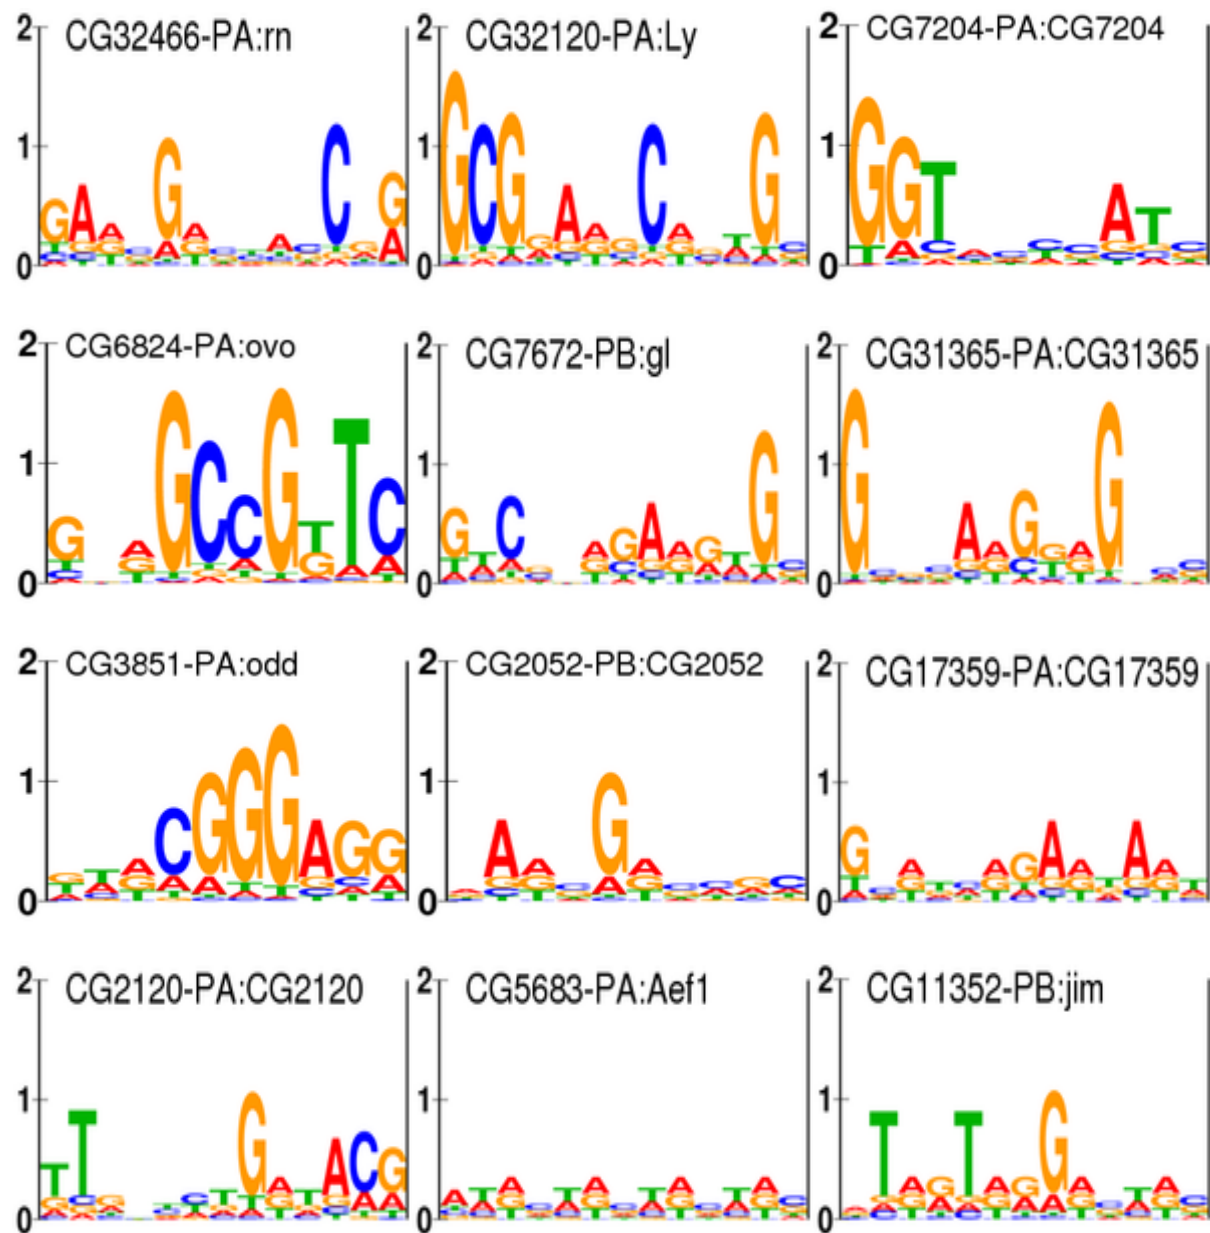

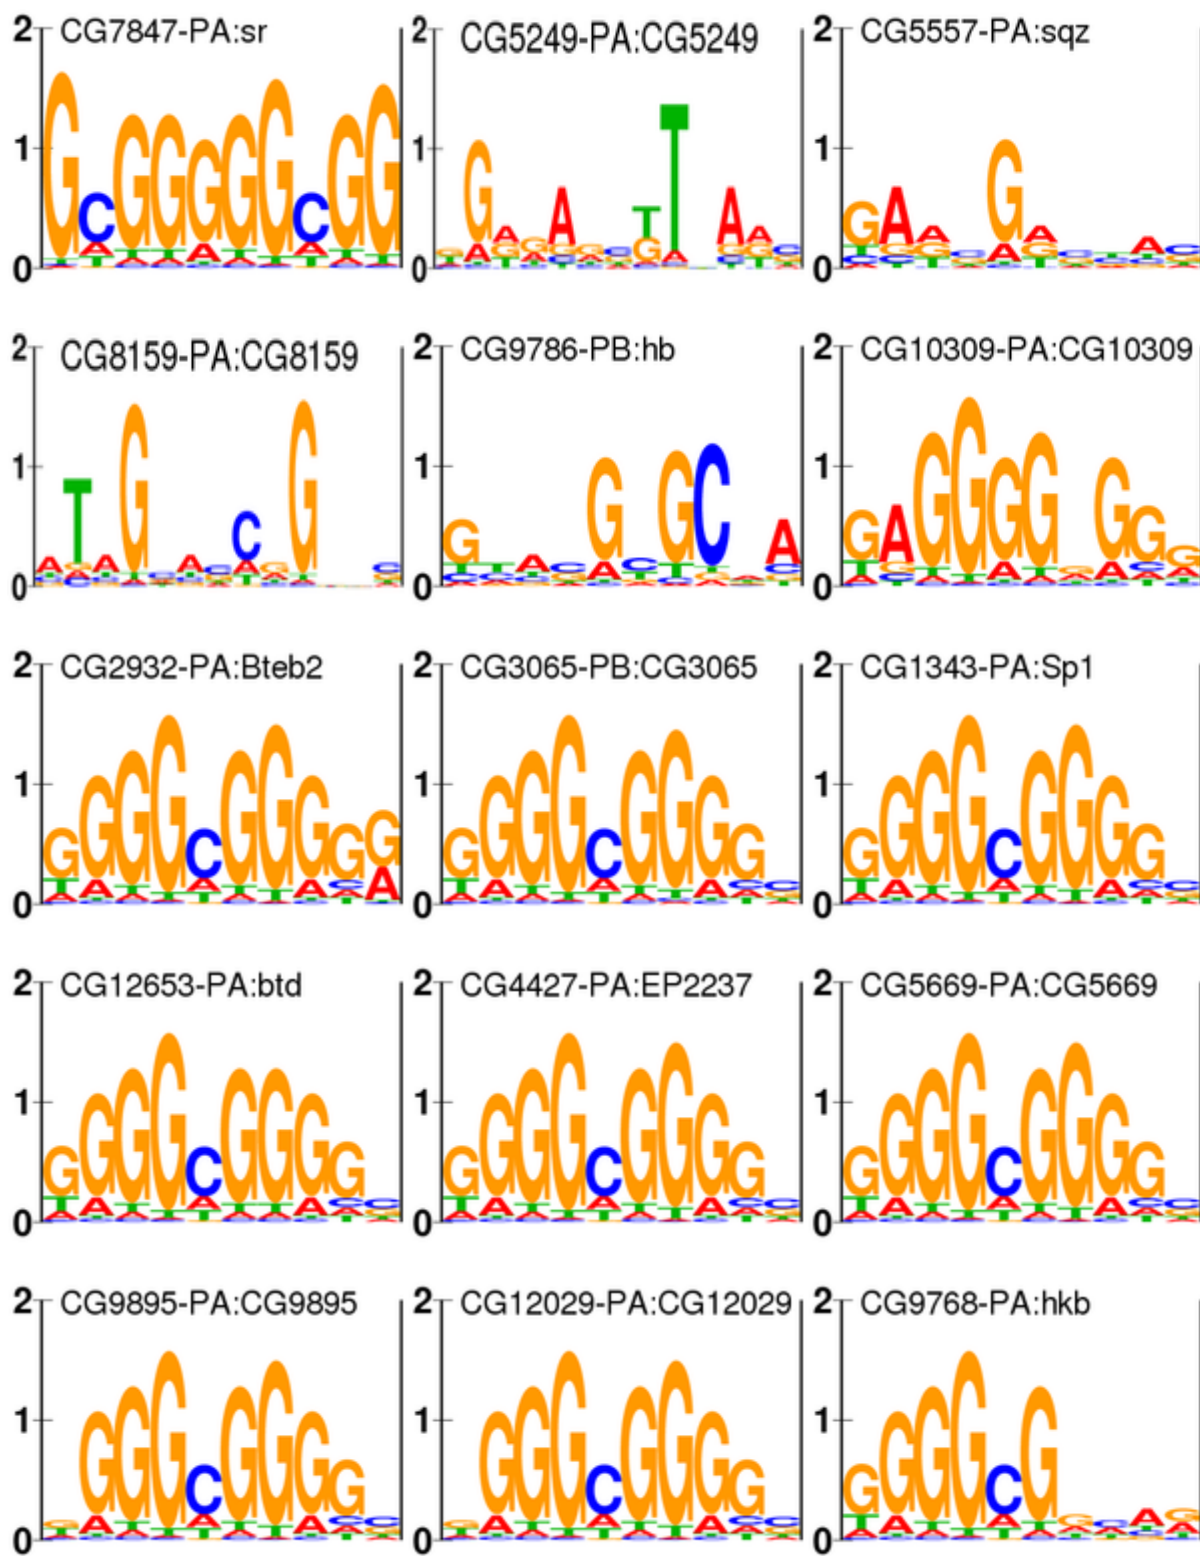

CG3340-PA:Kr

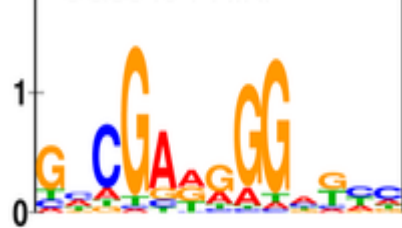

CG5245-PA:CG5245

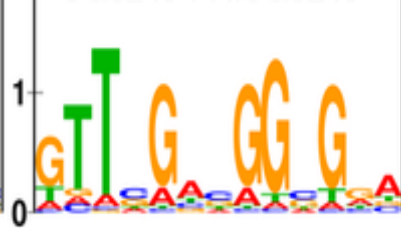

Supplement: S1 (10.1371/journal.pcbi.0010001.s001) [file journal.pcbi.0010001.s001]
