# Supplementary material for: Ab Initio Prediction of Transcription Factor Targets Using Structural Knowledge
Source: PLOS journal article supplement (doi:10.1371/journal.pcbi.0010001), 2005-06-24

## Figure S4 - Results of complete GO table

Full table of gene annotation enrichment among the putative target sets of 29 transcription factors in *D. melanogaster*. Blue cells correspond to significant over-abundance of a GO term (row) among the predicted targets of a protein (column), using a hyper-geometric test. The data are corrected for multiple tests using FDR and only significant cells ( $p < 0.05$ ) are shown.

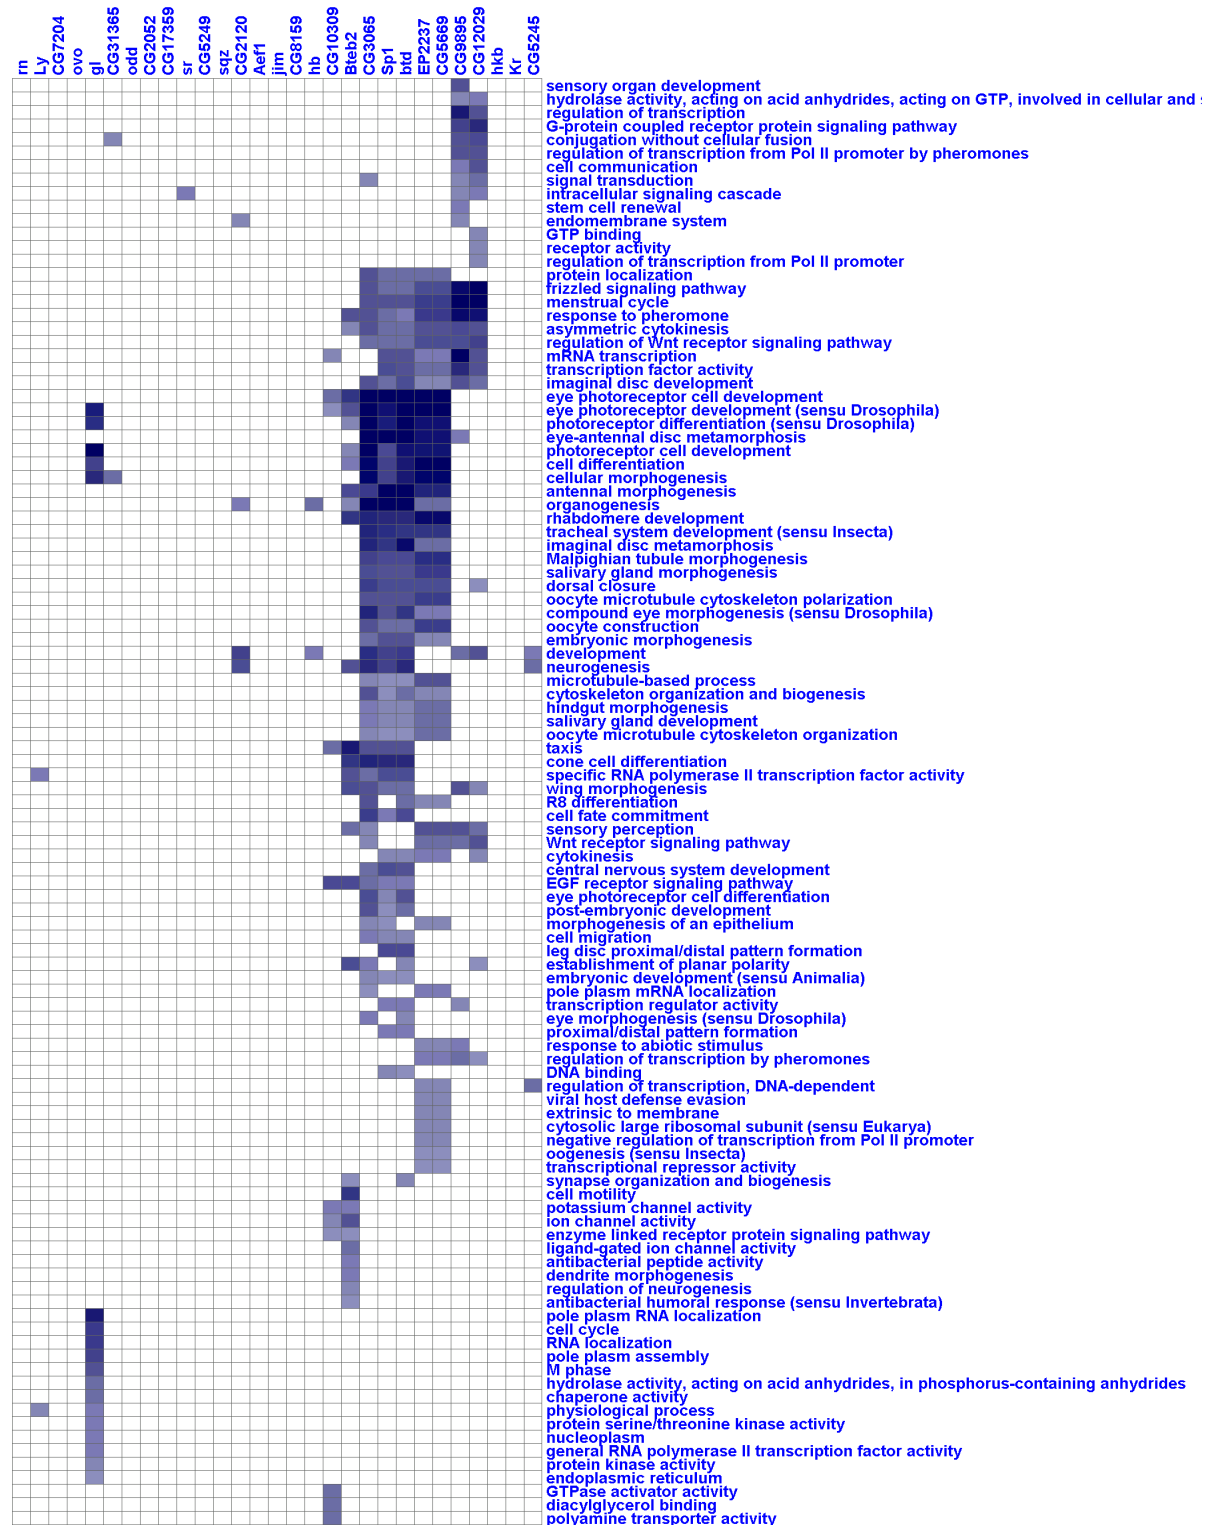

Supplement: S4 (10.1371/journal.pcbi.0010001.s004) [file journal.pcbi.0010001.s004]
