# Supplementary material for: Ab Initio Prediction of Transcription Factor Targets Using Structural Knowledge
Source: PLOS journal article supplement (doi:10.1371/journal.pcbi.0010001), 2005-06-24

### Figure S5 - Abundance of DNA-binding residues in the training data.

The training data consists of 1320 zinc fingers that interact with 455 binding sites. The abundance of each residue at each DNA-binding position is plotted in the following four figures.

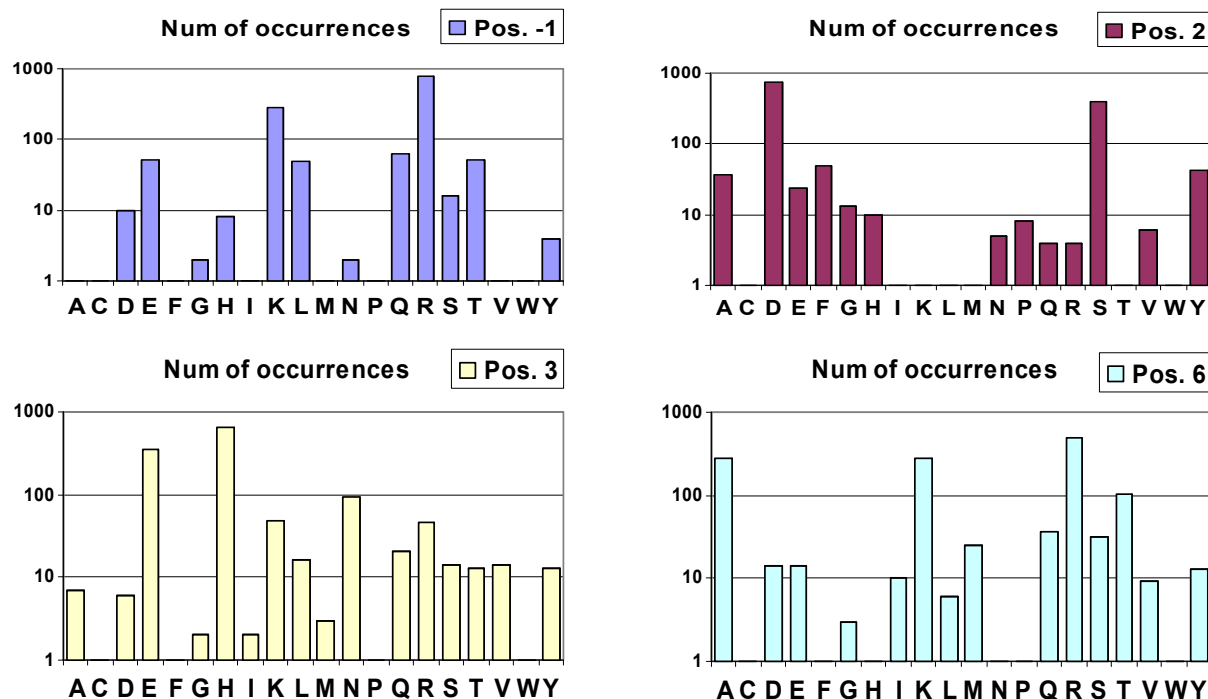

Supplement: S5 (10.1371/journal.pcbi.0010001.s005) [file journal.pcbi.0010001.s005]
