# Supplementary material for: Ab Initio Prediction of Transcription Factor Targets Using Structural Knowledge
Source: PLOS journal article supplement (doi:10.1371/journal.pcbi.0010001), 2005-06-24

### Figure S7 - Convergence of the EM algorithm on held-out test data.

10-fold cross-validation tests show a significant improvement in the average log-likelihood per interaction (in bits), along 14 EM iterations. We show the improvement of the recognition preferences for different starting points. These include the prior knowledge parameters from Mandel-Gutfreund et al. (2001) and random starting points.

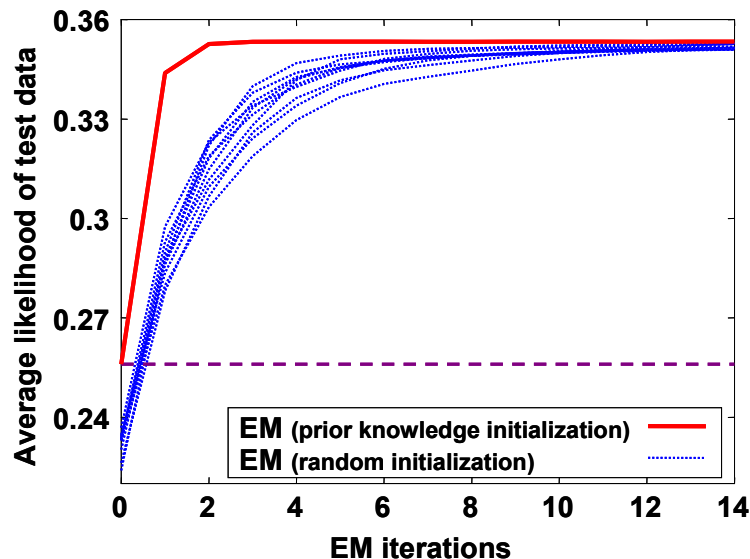

Supplement: S7 (10.1371/journal.pcbi.0010001.s007) [file journal.pcbi.0010001.s007]
